# Supplementary material
Source: MDPI journal article supplement (https://www.mdpi.com/2571-9408/3/2/22)
Supplement: s1 [file s1]

## Sheet: Long Island
Wreck Name	LAT	LONG	Depth (m)	Preservation	Visible in TBDSM
Good Humor Barge	40.0528	-73.7308	17-20	Good	Yes
Bouy #4 Barge	40.5279	-73.7312	17-20	Fair	Yes
Fran S	40.5274	-73.7302	20	Good	Yes
Stone Barge	40.5407	-73.5407	17	Poor	No
Edmonds Duke	40.5571	-73.5272	17	Poor	No
Rhoda	40.6039	-73.43	6	Fair	Yes
Acara	40.5761	-73.5625	8	Poor	No
Howard	40.5761	-73.5625	6	Poor	No
AWOIS record 7793			15	Fair	No
AWOIS record 7693			5	Unknown (fair-good)	Yes
AWOIS record 6357			3	Fair	Yes
AWOIS record 6501			23	Good	Yes
AWOIS record 12843			13	Fair	No
Swede (AWOIS record 6366)			6	Good	Yes
ENC Wreck	40.8798	-73.765	3	Good	Yes
AWOIS record 11342			19	Unknown (poor-fair)	No
ENC Wreck	40.878	-73.7176	14	Fair	Yes
AWOIS record 6370			6	Fair	Yes
AWOIS record 8742			3	Poor	No
AWOIS record 5628			4	Fair	Yes
AWOIS record 5639			4	Poor	Yes
AWOIS record 5644			3	Poor	No
AWOIS record 4405			10	Fair	Yes
AWOIS record 7519			18	Fair	Yes
AWOIS record 12629			24	Unknown (poor-fair)	No
Blue Hammer (AWOIS 6394)			8	Poor-Fair	Yes
AWOIS record 6428			8	Poor-fair	Yes
ENC Wreck	40.9829	-73.4319	25	Good	Yes	reidentified automatically
ENC Wreck	41.0451	-73.4218	3	Unknown (Poor-fair)	No
AWOIS record 11826			29	Good	Yes
AWOIS record 7745			35	Good	Yes	reidentified automatically
AWOIS record 4454			29	Good	Yes	reidentified automatically
AWOIS record 11377			35	Good	Yes	reidentified automatically
Benjamin Packard (AWOIS 7684)			38	Good	Yes
AWOIS 12669			42	Poor	No
LiDAR specifically identified
ENC Wreck	40.6014	-73.809	2	Fair	Yes
ENC Wreck	40.5983	-73.8141	2	Poor	Yes
ENC Wreck	40.5953	-73.8047	2	Poor	No
ENC Wreck	40.5956	-73.8072	2	Poor	No
AWOIS record 6719			2	Poor	Yes
AWOIS record 6395			3	Fair	Yes
Automatically Detected using Inversed Depression Analysis w/contour trees (Wu et al. 2015/2016)
AWOIS 11840			27	Fair-good	Yes
ENC Wreck	40.9836	-73.4191	29	Poor	No	Not identified manually either
AWOIS 11826			24	Good	Yes
ENC Wreck	40.9849	-73.4092	31	Poor-fair	Yes
AWOIS 12695			37	Fair	Yes
ENC Wreck	40.9912	-73.4129	38	Good	Yes
ENC Wreck	40.9916	-73.409	33	Unknown (fair-good)	Yes
AWOIS 11832			43	unknown (fair?)	Yes
AWOIS 11834			47	Good	Yes
AWOIS 11828			46	Unknown (poor?)	Yes
AWOIS 14052			56	Fair-good	Yes
AWOIS 12669			42	Poor	No	Not identified manually either
ENC Wreck	40.9955	-73.4266	41	Good	Yes
ENC Wreck	40.9952	-73.4311	41	Fair	Yes
ENC Wreck	40.993	-73.4316	44	Unknown (fair)	Yes
AWOIS 7754			42	Good	Yes
AWOIS 12709			39	Unknown (poor?)	No	Not identified manually either
AWOIS 12680			36	Fair	Yes
AWOIS 11370			33	Fair	Yes
ENC Wreck	40.982	-73.4266	26	Poor-fair	Yes
AWOIS 12624			31	Good	Yes
AWOIS 11396			29	Good	Yes
AWOIS 12676			32	Fair	Yes
ENC Wreck	40.9983	-73.4355	34	Good	Yes
ENC Wreck	40.9912	-73.4375	40	Good	Yes
ENC Wreck	40.99	-73.4401	35	Fair	Yes
ENC Wreck	40.9908	-73.4426	32	Good	Yes
ENC Wreck	40.9915	-73.4448	42	Unknown (poor-fair)	No	Manually identified, but very subtle. With lower threshold automatically identified
ENC Wreck	40.9885	-73.4434	39	poor-fair	Yes
AWOIS 11829			31	Good	Yes
ENC Wreck	40.9934	-73.4062	37	Good	Yes
Four additional wrecks reidentified from manual evaluation (indicated above)
All Identified Wrecks in NOAA Database
Dataset	RECRD	Depth (m)	Condition
AWOIS	11826	20.5679	Good
AWOIS	11829	32.894	Good
AWOIS	11830	33.3604	Fair
AWOIS	11832	40.9285	Fair-good
AWOIS	11834	32.8513	Good
AWOIS	11836	37.5331	Unknown (Poor-fair)
AWOIS	11837	28.9072	Fair
AWOIS	11838	32.2905	Poor
AWOIS	11363	28.9469	poor-fair
AWOIS	11364	30.3276	Fair
AWOIS	11365	26.6852	Good
AWOIS	11366	24.9966	Unknown (poor?)
AWOIS	11367	33.2445	Fair
AWOIS	11368	35.2105	Good
AWOIS	11369	26.8011	Good
AWOIS	11371	26.5999	Good
AWOIS	11373	39.1668	unknown (poor-fair)
AWOIS	11374	28.3555	Fair-good
AWOIS	11376	23.9268	Good
AWOIS	11380	26.2341	Fair
AWOIS	14086	29.3035	unknown (fair-good)
AWOIS	12620	23.4117	Good
AWOIS	12632	30.7726	Good
AWOIS	12633	31.3152	Good
AWOIS	12634	31.8425	Good
AWOIS	12638	30.1295	Good
AWOIS	12646	29.8704	Good
AWOIS	12647	26.2616	Good
AWOIS	12649	31.6474	Fair
AWOIS	12659	33.528	Good
AWOIS	12670	28.3464	Good
AWOIS	12671	32.5557	Good
AWOIS	12678	31.0683	Good
AWOIS	12679	30.2179	Good
AWOIS	12683	31.8943	Good
AWOIS	12684	25.4508	Poor-fair
AWOIS	12689	41.0627	Fair
AWOIS	12691	31.2786	Fair
AWOIS	12692	38.4048	Fair
AWOIS	12693	31.6992	Unknown (poor-fair)
AWOIS	12694	37.8744	Good
AWOIS	12695	33.6286	Fair
AWOIS	12697	20.6685	Unknown (poor-fair)
AWOIS	12703	40.2336	Good
AWOIS	12706	34.0401	Poor-fair
AWOIS	12710	45.022	Good
AWOIS	12713	52.6877	Poor
AWOIS	12715	36.1432	Unknown (poor?)
AWOIS	12722	25.527	Good
AWOIS	7745	28.892	Fair
AWOIS	7746	29.7729	Good
AWOIS	7747	31.9308	Good
AWOIS	7754	37.6824	Good
AWOIS	7759	36.6644	Fair-good
AWOIS	4388	21.287	Unknown (fair?)
AWOIS	4390	22.86	Unknown (poor-fair)
ENC Identified Wrecks	FID (shapefile identifier)
ENC	846
ENC	851
ENC	854
ENC	859
ENC	860
ENC	861
ENC	863
ENC	864
ENC	866
ENC	867
ENC	868
ENC	872
ENC	874
ENC	875
ENC	876
ENC	877
ENC	878
ENC	879
ENC	882
ENC	883
ENC	885
ENC	886
ENC	890
ENC	891
ENC	892
ENC	893
ENC	894
ENC	902
ENC	906
ENC	909
ENC	5031
ENC	5041
ENC	5049
ENC	5056
ENC	5058
ENC	5073
ENC	5081
ENC	5085
ENC	5101
ENC	5112

## Sheet: Massachusetts
Wreck Name	LAT	LONG	Depth (m)	Preservation	Visible in TBDSM
AWOIS 12448	42.3306	-71.0026		-	Yes
Sidewinder	42.3401	-70.9528		-	Yes
AWOIS 13675	42.6077	-70.7601		-	Yes
AWOIS 4239 1	42.6133	-70.6796		-	Yes
AWOIS 4239 2	42.6133	-70.68		-	No
ENC	42.6056	-70.6552	0	Visible	No
ENC	42.6057	-70.6557	0	Visible	Yes
AWOIS 7320 Chester A. Poling (stern)	42.5736	-70.6708	24.6888	Good	Yes
ENC	42.5733	-70.655	27.7368	-	Yes
AWOIS 11928	42.6102	-70.6584	4.15	Good	Yes
AWOIS 11932	42.6146	-70.6544	5.4	Good	Yes
ENC	42.6116	-70.6511	0.57912	Good	Yes
ENC	42.6089	-70.6552	2.07264	-	No
ENC	42.6142	-70.6487	2.71272	-	No
ENC	42.614	-70.649	3.9624	-	Yes
ENC	42.5817	-70.6683	6.94944	-	No
AWOIS 10351	42.3009	-70.9682	3.048	-	Yes
AWOIS 10350	42.3186	-71.0031	1.70688	-	No
AWOIS 10347	42.3116	-71.0175	0.79248	-	No
ENC	42.3373	-70.9892	0	-	No
Dixie Sword	41.5493	-69.9806	0	Good	Yes
AWOIS 11540	41.5276	-69.9845	10.9728	-	Yes
AWOIS 11574	41.5237	-70.0021	10.9728	-	Yes
AWOIS 11573	41.5228	-69.9926	7.62	-	Yes
AWOIS 11575	41.5177	-70.0051	14.0208	-	Yes
ENC	41.5351	-70.0128	28	-	No
Alva	41.5555	-69.9045	8.5344	Good	Yes
AWOIS 11538	41.5616	-69.9026	9.7536	-	Yes
Horatio Hall	41.5527	-69.9026	6.7056	Good	Yes
AWOIS 11539	41.546	-69.9461	11.8872	-	No
CONNECTICUT	41.6368	-69.9128	0	-	Yes
AWIOS 1944	41.6683	-69.9145	3.048	-	No
PENDLETON	41.5874	-69.9606	4.8768	-	No
ARANSIS	41.5907	-69.8747	15.8496	-	No
AWOIS 1947	41.7084	-69.8517	0	-	No
ENC	41.7115	-69.9358	0	-	No
ENC	41.6889	-69.9469	2.7432	-	No
ENC	41.57	-69.9433	5.7912	-	Yes
AWOIS 11062	41.55	-69.9628	10.9728	-	No
ENC	41.5148	-69.9694	8.29056	-	No
AWOIS 14799	41.4539	-70.2445	6.45	-	Yes
AWOIS 8284	41.4085	-70.2578	18.288	-	No
AWOIS 8292	41.514	-70.3722	1.8288	-	Yes
AWOIS 6856	41.3715	-70.1534	13.4112	-	Yes
MARIE HOOPER	41.4001	-70.1261	11.9177	-	Yes
JOHN PAUL	41.4477	-70.3861	15.301	-	Yes
SENECA	41.4523	-70.3016	5.66318	-	Yes
WRECK	41.4543	-70.2672	6.58978	-	Yes
AWOIS 6857	41.4449	-70.2029	9.7536	-	Yes
AWOIS 8285	41.4042	-70.2161	3.3528	-	Yes

## Sheet: Louisiana
Wreck ID	Lat	Long	Depth (m)	Preservation	Visible in TBDSM
AWOIS 14356			10.9728	unkown (poor?)	No
AWOIS 13456			24.384	unknown (fair-good)	Yes
AWOIS 13219			10.0584	Poor	No
AWOIS 13381			15.5448	unknown (poor)	No
AWOIS 13454			27.432	unknown (good)	Yes
AWOIS 14495			17.6784	unknown (poor)	Yes
AWOIS 14321			6.096	Poor	Yes
ENC Wrecks	29.1881	-90.3799	1.524	unknown (excellent)	Yes
ENC Wrecks	29.1686	-90.285278	2.4384	Excellent	Yes
ENC Wrecks	29.1169	-90.2668	0.9144	unknown (poor)	No
AWOIS 13376			24.384	unknown (poor)	No
ENC Wrecks	29.0059	-90.3384	9.4488	unknown(poor)	No
AWOIS 8659			2.46888	unknown(excellent)	Yes
ENC Wrecks 5	30.1466	-89.4116	2.62128	unknown(poor)	No
ENC Wrecks 2	30.15	-89.41	2.62128	unknown(poor)	No
AWOIS 8633			2.286	Good	Yes
AWOIS 8634			2.7432	Good	Yes
ENC Wrecks 2	30.2333	-89.1501	2.7432	unknown (good)	Yes
ENC Wrecks 5	30.2216	-89.1497	2.37744	unkown	No
AWOIS 8638			5.1816	Moderate	Yes
ENC Wrecks 2	30.1798	-89.2258	4.572	unknown	Yes
ENC Wrecks 2	30.2051	-89.2579	1.2192	unkown	Yes
AWOIS 8637			1.2192	Poor	Yes
AWOIS 8666			3.10896	Poor	No
ENC 5	30.2228	-89.2864	3.52044	unknown	Yes
ENC 2	30.1348	-89.0108	7.62	unkown (good)	Yes
ENC 2	30.1559	-89.0764	4.8768	unknown (good)	No
AWOIS 444			2.49936	unknown	No
ENC Wrecks 2	29.6987	-89.4146	3.048	unknown	No
ENC Wrecks 2	29.6927	-89.3647	1.6764	unknown	No
AWOIS 437			0	Good	No
AWOIS 8661			2.4384	unknown	Yes
AWOIS 8660			0.6096	good	Yes
AWOIS 8640			3.30708	Poor	No
AWOIS 8639			3.3528	Poor	No
AWOIS 8641			2.7432	unknown	No
AWOIS 8642			2.7432	unknown	No
AWOIS 8647			2.3622	Good	No
AWOIS 8648			2.63652	unknown	No
AWOIS 8649			2.62128	unknown	Yes
AWOIS 8650			2.286	Moderate	Yes
AWOIS 8654			2.98704	Good	No
AWOIS 8655			2.55118	Moderate	Yes
AWOIS 14320			8.50392	Moderate	No
AWOIS 14274			5.42544	Good	No
AWOIS 14259			3.74904	Poor	Yes
AWOIS 14261			2.7432	unknown	No
AWOIS 13461			3.5052	unknown	No
AWOIS 15054			28.1178	unknown	No
